## Predictors of changes in cerebral perfusion and oxygenation during obstructive sleep apnea

Zhongxing Zhang<sup>1</sup>, Ming Qi<sup>1</sup>, Gordana Hügli<sup>1</sup>, Ramin Khatami<sup>1,2</sup>

<sup>1</sup> Center for Sleep Medicine and Sleep Research, Clinic Barmelweid AG, Barmelweid, Switzerland

<sup>2</sup> Department of Neurology, Inselspital, Bern University Hospital and University of Bern, Bern, Switzerland

### Corresponding author information:

Prof. Ramin Khatami

Center for Sleep Medicine and Sleep Research,

Klinik Barmelweid,

CH-5017, Barmelweid

Switzerland

[ramin.khatami@barmelweid.ch](mailto:ramin.khatami@barmelweid.ch)

### Abstract

Obstructive sleep apnea syndrome (OSAS) is a well-known independent risk factor for developing cardiovascular/cerebrovascular diseases. However, the underlying pathomechanisms of how recurrent respiratory events impair cerebral perfusion are still unknown. In this controlled study we quantify how different pathophysiological mechanisms contribute to changes in cerebral perfusion and oxygenation during sleep apneas/hypopneas before and during continuous positive airway pressure (CPAP) treatment. OSAS patients underwent a stepwise incremental CPAP titration protocol during polysomnography recordings: 1-h sleep without CPAP served as self-controlled baseline followed by stepwise increments of 1-cmH<sub>2</sub>O pressure per-hour starting from 5-8 cmH<sub>2</sub>O individually. Frequency-domain near-infrared spectroscopy measured blood volume (BV) and oxygen saturation (StO<sub>2</sub>) in the left forehead. The coefficients of variation of BV (CV-BV) and the decreases of StO<sub>2</sub> (de-StO<sub>2</sub>) during respiratory events were predicted by age, sex, body-mass-index, sleep stages, sleep positions, types and durations of events,

mean heart rate (HR) during events, CPAP pressures and the apnea-hypopnea-index/arousal-index/leg-movement-index under different CPAP pressures using linear mixed-effect models, respectively. Longer events and apneas rather than hypopneas induce larger CV-BV and stronger cerebral desaturations. Events with higher cerebral StO<sub>2</sub> preceding onsets, occurring during rapid-eye-movement sleep and associated with higher HR cause smaller CV-BV and de-StO<sub>2</sub>. Sleep position influences the changes in cerebral BV. CPAP pressures stepwise attenuate the changes in CV-BV and de-StO<sub>2</sub>. The length of respiratory event may indicate the severity of cerebral vascular damage in OSAS. Brain activity (e.g., sleep stages and baseline StO<sub>2</sub>) and systemic HR/CPAP pressures also affect the changes in cerebral perfusion and desaturation in OSAS.

### **Key Message:**

The underlying pathomechanisms of how recurrent respiratory events in OSAS impair cerebral perfusion are still unknown. We found that in OSAS-patients the length and the type but not the number of the respiratory events (as indexed by AHI) are the strongest predictor of changes in brain perfusion/oxygenation and CPAP therapy can attenuate the induced brain hemodynamic changes. Our study provides evidence based on cerebral hemodynamic changes to support the notion that the duration of the apnea/hypopnea events rather than AHI may better indicate the severity of OSAS.

### **Introduction**

In obstructive sleep apnea syndrome (OSAS) recurrent respiratory events induce repetitive changes in cerebral perfusion and oxygenation which are associated with an increased cardiovascular risk [1-3]. A better understanding of how recurrent sleep apneas/hypopneas affect cerebral autoregulation (CA) may provide valuable insights into the acute and chronic consequences including cerebral damage of OSAS [3-6]. Intact CA during both wake and sleep is essential to maintain a constant perfusion of brain tissue and a prerequisite to prevent acute and chronic brain damage [7-9]. Previous studies [4-6, 8, 10-12] have

shown impaired cerebrovascular regulation, suggesting that OSAS patients chronically exposed to repetitive hypoxemia and cerebral perfusion changes are at permanent risk to cerebral ischemia due to recurrent hypopnea/apnea events. Indeed, a recent study demonstrated recurrence of cerebral deoxygenation along with recurrence of previously treated nocturnal breathing disturbances when therapeutic continuous positive airway pressure (CPAP) was withdrawn [11]. While these studies confirmed the repetitive changes in cerebral deoxygenation and perfusion directly caused by the respiratory events, the underlying mechanisms determining the severity of the changes are still unknown. Change in cerebral hemodynamics is a net effect resulting from a combination of multiple pathophysiological factors that challenge CA in OSAS, e.g., cerebral deoxygenation, cardiac output and heart rate (HR), intrathoracic pressure (ITP) swings, hypercapnia, hypoxia, sleep stages and arousals. For example, the ITP swings during OSAS events are associated with decreased cardiac output and HR [13-15], leading to a reduced global blood/oxygen supply to the brain. On the other hand, acute hypoxia and hypercapnia cause an increase in cerebral blood flow via dilations of cerebral arteries and arterioles [16], counteracting the increase in blood pressure and blood supply. In addition, sleep related factors such as different sleep stages [17-19], and arousals can also cause changes in cerebral hemodynamics [20, 21], adding to the complexity of cerebral regulation during sleep.

In this study we aim to investigate how the aforementioned different pathophysiological mechanisms quantitatively affect changes in cerebral perfusion and oxygenation in sleep apneas/hypopneas. We used near-infrared spectroscopy (NIRS), a well-validated optical technique in assessing the cerebral hemodynamic changes in apneas/hypopneas [4, 9-12, 22, 23], to measure the local hemodynamic changes induced by apneas/hypopneas in microvascular bed which is more challenging for CA [24, 25]. NIRS is sensitive to hemodynamic changes in microvascular bed (i.e., arterioles, venules and capillaries) [26, 27]. It can simultaneously measure changes in both blood volume (BV) and tissue oxygen saturation (StO<sub>2</sub>), thus providing better insights into the cerebral hemodynamic consequences of OSAS.

## **Methods**

Totally 29 newly diagnosed OSAS patients (age [mean  $\pm$  standard deviation, std.]: 54.7 $\pm$ 13.9 years, interquartile range [IQR] 42-65 years; male: 26; body-mass-index [BMI]: 35.8 $\pm$ 7.2, IQR 31.9-41.6; apnea-hypopnea-index [AHI]: 53.1 $\pm$  24.6/h, IQR 32.7-70 /h) participated in this study. Patients with unstable coronary or cerebral artery disease, severe arterial hypertension or hypotension, respiratory diseases or a history of a sleep-related accident were excluded. This study was approved by the local ethical commission of Northwest Switzerland, and was in compliance with the declaration of Helsinki.

In the first night all the patients did video-polysomnography (PSG) measurement (Embla RemLogic, Natus Medical Incorporated, Tonawanda, NY, USA) for diagnosis. On next day the patients diagnosed as OSAS and clinically recommended for CPAP therapy gave their written informed consent. In the following night they did the stepwise CPAP (AirSense™10, ResMed) titration together with video-PSG and NIRS recordings: 1-h sleep without CPAP served as the self-controlled baseline followed by stepwise increment of 1-cmH<sub>2</sub>O pressure per-hour starting from 5-8 cmH<sub>2</sub>O depending on the individuals.

video-PSG measured electroencephalography at electrode locations of C3, C4, O1, O2, F3, and F4 according to 10–20 system, electrooculogram, electromyogram, electrocardiogram, breathing functions, HR, peripheral oxygen saturation and the movement during sleep. Two experienced sleep technologists independently scored the sleep stages, respiratory and limb movement events, and motion artifacts in 30-s epochs according to the 2017 American Academy of Sleep Medicine manual [28]. The discrepancy between these two technologists was solved by their discussion or the recommendation of the third experienced neurophysiologist. The hourly AHI, arousal-index (AI), leg-movement-index (LMI) under specific CPAP pressure per-hour were also calculated (i.e., the number of events divided by the sleep time under each CPAP pressure per-hour in the titration protocol).

Frequency-domain multi-distance (FDMD)-NIRS (Imagent, ISS, Champaign IL, USA) measurements were conducted over the middle of left forehead. The cerebral oxygenated (HbO<sub>2</sub>) and deoxygenated (HHb) hemoglobin were calculated from the fitted slopes of the modulated light amplitude and phase shifts over four various light sources and detector distances [29, 30]. The sum of HbO<sub>2</sub> and HHb was the

cerebral BV. The absolute value of StO<sub>2</sub> was also calculated in FDMD-NIRS [30]. The sample rate of FDMD-NIRS recording was 5.2 Hz. 2-s preceding and 5-s following the sleep apnea/hypopnea event was selected as baseline and recovery phase, respectively. More details of the FDMD-NIRS measurement can be found in the supplemental file.

The coefficient of variation (CV) of BV (CV-BV) during apnea/hypopnea and recovery phase was calculated. CV is a standardized measure (i.e., standardization) of the variability of the data in relation to their mean, i.e.,  $CV=100 \times \text{std./mean}$ . It was used in previous NIRS studies quantifying the cerebral hemodynamic changes between subjects as it can eliminate the bias due to individual differences [27, 31]. Smaller changes in CV-BV indicated smaller changes in the cerebral perfusion. The mean StO<sub>2</sub> at baseline before event onset and the subsequent decrease (de-StO<sub>2</sub>, which was the maximal value minus the minimal value after event onset) were also calculated.

Linear mixed-effects model (LMM) with a random intercept by patients was used to quantify which parameters determining the CV-BV and the de-StO<sub>2</sub> caused by the apneas/hypopneas, respectively. The explanatory variables were age, sex, BMI, sleep stages, sleep positions, types and durations of respiratory events, mean HR during the events, the baseline StO<sub>2</sub> before the onset of the event, CPAP pressures and the per-hour AHI/AI /LMI under each pressure. In each patient all the events under a specific CPAP pressure were excluded from LMM if the corresponding sleep duration under that pressure was shorter than 20 minutes, to exclude the unreliable calculation of the per-hour AHI/AI/LMI. In total the data of 2167 events from 27 patients were selected. One male was excluded because of the falling off of his position sensor. One female was excluded because of short sleep time. Box plot was used to graphically depict the CV-BV and the de-StO<sub>2</sub>. Outliers of the box plots were further excluded from LMM to avoid violating the model assumptions of normality and homoscedasticity. Stepwise regression using both forward selection and backward elimination was done to select the best predictors. We reported both the conditional  $R^2$  [32] and  $\mathcal{Q}^2$  [33] to assess the goodness of fit of our final selected models.

Data were expressed as the mean  $\pm$  standard error (SE) unless otherwise indicated. All statistical analyses and modeling were performed using R (version 3.2.4). The LMM models were done using the R package *lme4* and *lmerTest*.

## Results

### Changing trends of cerebral hemodynamics

In total FDMD-NIRS successfully measured 884 events (205 obstructive apneas and 679 hypopneas) at 1-hour baseline recordings without CPAP and 1873 events (239 obstructive apneas and 1634 hypopneas) during stepwise CPAP titrations. The distributions of the durations of the events at baseline and during titration were shown in Fig.1. The most frequent events were 12-16 seconds at baseline and 13-20 seconds during CPAP titration.

Fig.2 showed a sample of NIRS changes. Cerebral HbO<sub>2</sub> and StO<sub>2</sub> decreased and HHb increased after the onsets of the events and their changes were reversed after the end of the events, which was a typical hemodynamic pattern triggered by obstructive apneas and hypopneas reported in previous studies [4, 10, 12, 23]. There was a phase shift between BV and StO<sub>2</sub>. BV started to decrease before the event onsets and then increased after reaching its nadir within the events, while StO<sub>2</sub> started to decrease after the event onsets and it reached its nadir later than BV. The increased BV within the events could be due to cerebral vasodilation triggered by acute hypoxia and hypercapnia. The decrease in BV that occurred after the end of the events could indicate cerebral vasoconstriction in the recovery phase.

### Results of LMMs analyses

The CV-BV and de-StO<sub>2</sub> were significantly correlated as shown in Fig.3 (A). The distribution of the CV-BV was shown in Fig.3 (B) and its mean value was  $1.4 \pm 0.02\%$  (IQR: 0.7%-1.6%). Its maximum was 3% as shown in the box plot in Fig. 3 (B), so the data larger than 3% were outliers (n=156). Similarly, the distribution of the de-StO<sub>2</sub> (mean value:  $4.02 \pm 0.06\%$ , IQR: 2.15%-4.79%) was illustrated in Fig.3 (C) and box plot suggested that the data larger than 8.7% were outliers (n=149). Thus 2011 (247 obstructive

apneas and 1764 hypopneas) and 2018 (248 obstructive apneas and 1770 hypopneas) events were finally used to build the LMMs for the CV-BV and the de-StO<sub>2</sub>, respectively.

The outcomes of the final LMMs selected by stepwise regressions were shown in Table 1 and Table 2. The conditional  $R^2$  and  $\mathcal{Q}^2$  of the model for CV-BV were 0.77 and 0.65, respectively. These two values of the model for de-StO<sub>2</sub> were 0.81 and 0.72, respectively. In both models age, sex, BMI, AHI at diagnosis, and per-hour AHI/LMI were eliminated by the stepwise selections. The results were summarized as:

- 1) The duration and the type of the events were the most significant covariates determining the changes in cerebral hemodynamics. The changes in cerebral perfusion (i.e., CV-BV) and cerebral desaturation (i.e., de-StO<sub>2</sub>) were larger in the events of longer durations after the other covariates were controlled. Obstructive apneas induced larger CV-BV and cerebral desaturation compared to hypopneas.
- 2) Events associated with larger mean HR and higher baseline StO<sub>2</sub> induced smaller changes in cerebral perfusion and desaturation.
- 3) Events in rapid eye movement (REM) sleep caused smaller changes in CV-BV and de-StO<sub>2</sub> compared to the ones in non-REM (NREM) sleep.
- 4) Arousal system influenced the induced changes in cerebral perfusion but not in cerebral desaturation.
- 5) Sleep position did not affect cerebral desaturation but only the perfusion. The events caused larger changes in CV-BV when the patients slept on their right side or on their back compared to sleep on the left side. There was no difference in CV-BV between sleeping on the right side and on the supine position (stepwise regression gave t-value=1.60, P-value=0.11).
- 6) Finally, increased CPAP pressure can stepwise attenuate the event-related changes in cerebral hemodynamics.

Since it was unexpectedly to find that the event's length rather than AHI was the most significant predictor of the changes in cerebral hemodynamics, we illustrated the changes in CV-BV and de-StO<sub>2</sub>

versus the event's duration in each patient in Fig.4. The individual linear fitting lines in Fig.4 suggested that indeed in the majority of the patients the changes in CV-BV and de-StO<sub>2</sub> increased with the increases in the durations.

## **Discussion**

Our study for the first time quantifies the relative effect sizes of different pathophysiological mechanisms contributing to the cerebral hemodynamic changes in local microvascular bed induced by obstructive sleep apneas and hypopneas. The strengths of our study are: 1) We use a stepwise increment CPAP titration protocol in which the first hour sleep without CPAP is served as a self-control in newly diagnosed untreated patients. The stepwise CPAP titration gradually opens the upper airway, increases ITP, reduces hypoxia and hypercapnia, reduces the numbers of apneas/hypopneas and arousals, and finally consolidates sleep. This protocol allows us to gradually control and identify the most relevant factors from many potential physiological factors in a systematic way, and our results are not affected by pre-treatment effect as our patients are newly diagnosed; 2) We simultaneously quantify the changes in both cerebral perfusion (i.e., changes in BV) and oxygenation (i.e., changes in StO<sub>2</sub>), thus providing better insights into the relationship between local cerebral metabolism and blood supply during apneas/hypopneas. Remarkably, we find that duration and the type of the respiratory events rather than AHI are the most significant covariates determining the cerebral hemodynamic changes. Longer events induce stronger changes in cerebral perfusion and larger cerebral desaturation. Obstructive apneas lead to larger changes in cerebral BV and desaturation than hypopneas. In addition, brain activity (sleep stages, arousal and baseline cerebral oxygenation) as well as systemic parameter (i.e., HR and CPAP pressures) affect cerebral hemodynamics. Finally, our data demonstrate that CPAP is able to attenuate the cerebral hemodynamic changes triggered by the apneas/hypopneas.

Given that the event's inherent features such as duration and the type of event, are the most significant variables after controlling for other covariates (these results are also valid in naive apneas/hypopneas at baseline, see supplemental Results), our findings have important clinical implications. We suggest that the



duration of the event rather than AHI is a useful parameter indicating the severity of the cerebral damage in OSAS. Patients with extreme long apneas/hypopneas may need to pay special attention and CPAP treatment should be recommended even if their AHI values are not high because a progressive increase in the events' length may cause strong challenge of cerebrovascular autoregulation and an increased cerebrovascular risk. This assumption is supported by our models which also provide quantitative tools to assess the severity of cerebral hemodynamic changes. According to our model a longer duration of 5 seconds could induce  $1.33 \times 10^{-2}$  stronger (i.e.,  $2.66 \times 10^{-3} \times 5$ ) changes in CV-BV but the obstructive apnea in general causes  $19.53 \times 10^{-2}$  more changes than hypopnea. Thus, a 15-second hypopnea will cause larger changes in cerebral perfusion than a 10-second hypopnea but smaller changes in cerebral perfusion compared to a 10-second obstructive apnea.

The contributions of different covariates to the cerebral hemodynamic regulations quantified by our models are reasonable and interpretable, and are consistent with each other. Higher HR during the apnea/hypopnea events may indicate relative higher sympathetic activation and less reduction in systemic blood supply [14, 34]. More systemic blood supply is available for the brain in these events compared to in the ones with lower HR, thus they trigger smaller changes in cerebral perfusion and StO<sub>2</sub>. This could consistently explain why we found higher baseline StO<sub>2</sub> before the onsets of events could prevent the subsequent changes in cerebral perfusion and desaturation. Previous studies found that longer apnea events are associated with larger decrease in HR (i.e., smaller HR during the events) [34]. So it is reasonable that in our model the duration of the event and the mean HR within the event have contrary influences to the cerebral hemodynamics (see their fitted coefficients in Table 1 and 2).

The triggered cerebral hemodynamic changes are smaller in REM sleep compared to in NREM sleep, contrasting the existing data that during nocturnal REM sleep the obstructive apneas/hypopneas are associated with more severe peripheral oxygen desaturations [35-37]. One previous NIRS study also reported that the drops of cerebral StO<sub>2</sub> induced by obstructive sleep apneas/hypopneas are larger in REM sleep compared to in NREM sleep [22]. The different results could be explained by: 1). In our stepwise

incremental CPAP titration protocol the pressures are higher in REM sleep because REM sleep occurs mainly in the later period of sleep toward morning. So it is more likely that CPAP better restore the obstructive apneas/hypopneas in REM sleep compared to in NREM sleep. 2). The previous NIRS study [22] actually measured 13 patients during daytime nap without CPAP and only 4 patients had REM sleep. Most of their patients (8/13) had been on regular CPAP therapy before the study. So their results are unlikely to be comparable with ours, considering the different study protocols (i.e., nocturnal CPAP titration vs. normal daytime nap), different study populations (i.e., CPAP treatment naïve vs. regular CPAP treatment) and their small number of patients having REM sleep. 3). Cerebral oxygen saturation may be different from the peripheral one considering the unique cerebral CA mechanism. Previous studies found that the cerebral StO<sub>2</sub> measured by NIRS keeps increasing over the whole night sleep [38], indicating the brain may have higher oxygen supply in REM sleep. Therefore, we may hypothesize that probably even without CPAP the naïve apneas/hypopneas may cause smaller desaturation in the brain in REM sleep compared to in NREM sleep after controlling the other covariates (i.e., length and type of event, HR, sleep position, etc.), in spite of the stronger desaturation in peripheral tissues. This hypothesis needs to be tested in the future studies.

Sleep position can influence the changes in cerebral perfusion but not cerebral oxygenation. This result can be explained by the gravity that influences the local cerebral blood supply and CA [39]. As our NIRS sensor is placed on the left forehead higher perfusion in the left hemisphere is measured when the patients sleep on their left side compared to on their right side or on their back. This result indicates that cerebral blood supply can be regulated by factors such as sleep position independent from cerebral oxygen consumption during apneas/hypopneas.

There are several limitations in this study. First, the function of CA decreases with aging but age is not a significant predictor for changes in cerebral hemodynamics in our models. One possible explanation is that we only include patients with severe OSAS who need CPAP therapy, thus we could not include many young patients to cover a larger range of age. Second, we only had 3 female patients so we could not

investigate if gender could bias our results. Third, we do not measure CO<sub>2</sub> which may be a strong factor influencing cerebral hemodynamics because of the CPAP mask. Finally, we did not include central sleep apneas into analysis because it is difficult to distinguish the naïve ones from the treatment-emergent ones [40]. Future studies thoroughly studying the patterns of cerebral hemodynamics may be helpful to classify different central apneas and deepen our knowledge of the pathophysiological features/regulations of different types of sleep apneas and their hemodynamic consequences to the brain.

## Acknowledgments

This work was supported by Clinic Barmelweid Scientific Foundation. The data acquisition work was supported by the Research Fund of the Swiss Lung Association No.2014–22.

**Conflict of interest:** None

## References

1. Yaggi, H.K., Concato, J., Kernan, W.N., Lichtman, J.H., Brass, L.M., and Mohsenin, V. (2005). Obstructive sleep apnea as a risk factor for stroke and death. *N. Engl. J. Med.* 353, 2034-2041.
2. Heinzer, R., Vat, S., Marques-Vidal, P., Marti-Soler, H., Andries, D., Tobback, N., Mooser, V., Preisig, M., Malhotra, A., Waeber, G., et al. (2015). Prevalence of sleep-disordered breathing in the general population: the HypnoLaus study. *Lancet Respir Med* 3, 310-318.
3. Durgan, D.J., and Bryan, R.M., Jr. (2012). Cerebrovascular consequences of obstructive sleep apnea. *J Am Heart Assoc* 1, e000091.
4. Pizza, F., Biallas, M., Wolf, M., Werth, E., and Bassetti, C.L. (2010). Nocturnal cerebral hemodynamics in snorers and in patients with obstructive sleep apnea: a near-infrared spectroscopy study. *Sleep* 33, 205-210.
5. Furtner, M., Staudacher, M., Frauscher, B., Brandauer, E., Esnaola y Rojas, M.M., Gschliesser, V., Poewe, W., Schmidauer, C., Ritsch-Marte, M., and Hogg, B. (2009). Cerebral vasoreactivity decreases overnight in severe obstructive sleep apnea syndrome: a study of cerebral hemodynamics. *Sleep Med.* 10, 875-881.
6. Hajak, G., Klingelhofer, J., Schulz-Variszegi, M., Sander, D., and Ruther, E. (1996). Sleep apnea syndrome and cerebral hemodynamics. *Chest* 110, 670-679.
7. Tzeng, Y.C., Willie, C.K., Atkinson, G., Lucas, S.J., Wong, A., and Ainslie, P.N. (2010). Cerebrovascular regulation during transient hypotension and hypertension in humans. *Hypertension* 56, 268-273.
8. Balfors, E.M., and Franklin, K.A. (1994). Impairment of cerebral perfusion during obstructive sleep apneas. *Am. J. Respir. Crit. Care. Med.* 150, 1587-1591.
9. Pizza, F., Biallas, M., Kallweit, U., Wolf, M., and Bassetti, C.L. (2012). Cerebral Hemodynamic Changes in Stroke During Sleep-Disordered Breathing. *Stroke* 43, 1951-1953.

10. Zhang, Z., Schneider, M., Laures, M., Qi, M., and Khatami, R. (2016). The Comparisons of Cerebral Hemodynamics Induced by Obstructive Sleep Apnea with Arousal and Periodic Limb Movement with Arousal: A Pilot NIRS Study. *Front Neurosci* *10*, 403.
11. Schwarz, E.I., Furian, M., Schlatzer, C., Stradling, J.R., Kohler, M., and Bloch, K.E. (2018). Nocturnal cerebral hypoxia in obstructive sleep apnoea: a randomised controlled trial. *Eur. Respir. J.* *51*.
12. Ulrich, S., Nussbaumer-Ochsner, Y., Vasic, I., Hasler, E., Latshang, T.D., Kohler, M., Muehlemann, T., Wolf, M., and Bloch, K.E. (2014). Cerebral oxygenation in patients with OSA: effects of hypoxia at altitude and impact of acetazolamide. *Chest* *146*, 299-308.
13. Somers, V.K., Dyken, M.E., Clary, M.P., and Abboud, F.M. (1995). Sympathetic neural mechanisms in obstructive sleep apnea. *J. Clin. Invest.* *96*, 1897-1904.
14. Kohler, M., and Stradling, J.R. (2010). Mechanisms of vascular damage in obstructive sleep apnea. *Nat. Rev. Cardiol.* *7*, 677-685.
15. Andreas, S., Hajak, G., von Breska, B., Ruther, E., and Kreuzer, H. (1992). Changes in heart rate during obstructive sleep apnoea. *Eur. Respir. J.* *5*, 853-857.
16. Cipolla, M. ed. (2009). *Control of Cerebral Blood Flow* ( San Rafael (CA): Morgan & Claypool Life Sciences).
17. Zhang, Z., and Khatami, R. (2015). A Biphasic Change of Regional Blood Volume in the Frontal Cortex During Non-rapid Eye Movement Sleep: A Near-Infrared Spectroscopy Study. *Sleep*.
18. Zhang, Z., and Khatami, R. (2014). Predominant endothelial vasomotor activity during human sleep: a near-infrared spectroscopy study. *Eur. J. Neurosci.*
19. Fischer, A.Q., Taormina, M.A., Akhtar, B., and Chaudhary, B.A. (1991). The effect of sleep on intracranial hemodynamics: a transcranial Doppler study. *J. Child Neurol.* *6*, 155-158.
20. Nasi, T., Virtanen, J., Toppila, J., Salmi, T., and Ilmoniemi, R.J. (2012). Cyclic alternating pattern is associated with cerebral hemodynamic variation: a near-infrared spectroscopy study of sleep in healthy humans. *PLoS ONE* *7*, e46899.
21. Birziz, L., and Tachibana, S. (1964). Local Cerebral Impedance and Blood Flow during Sleep and Arousal. *Exp. Neurol.* *9*, 269-285.
22. Valipour, A., McGown, A.D., Makker, H., O'Sullivan, C., and Spiro, S.G. (2002). Some factors affecting cerebral tissue saturation during obstructive sleep apnoea. *Eur. Respir. J.* *20*, 444-450.
23. Olopade, C.O., Mensah, E., Gupta, R., Huo, D., Picchietti, D.L., Gratton, E., and Michalos, A. (2007). Noninvasive determination of brain tissue oxygenation during sleep in obstructive sleep apnea: a near-infrared spectroscopic approach. *Sleep* *30*, 1747-1755.
24. Kainerstorfer, J.M., Sassaroli, A., Tgavalekos, K.T., and Fantini, S. (2015). Cerebral autoregulation in the microvasculature measured with near-infrared spectroscopy. *J. Cereb. Blood Flow Metab.* *35*, 959-966.
25. Netzer, N.C. (2010). Impaired nocturnal cerebral hemodynamics during long obstructive apneas: the key to understanding stroke in OSAS patients? *Sleep* *33*, 146-147.
26. Liu, H., Chance, B., Hielscher, A.H., Jacques, S.L., and Tittel, F.K. (1995). Influence of blood vessels on the measurement of hemoglobin oxygenation as determined by time-resolved reflectance spectroscopy. *Med. Phys.* *22*, 1209-1217.
27. Iannetta, D., Inglis, E.C., Soares, R.N., McLay, K.M., Pogliaghi, S., and Murias, J.M. (2019). Reliability of microvascular responsiveness measures derived from near-infrared spectroscopy across a variety of ischemic periods in young and older individuals. *Microvasc. Res.* *122*, 117-124.
28. Berry, R.B., Brooks, R., Gamaldo, C.E., Harding, S.M., Lloyd, R.M., Marcus, C.L., and Vaughn, B.V. (2017). *The AASM Manual for the Scoring of Sleep and Associated Events: Rules, Terminology and Technical Specifications*, (Darien, IL: American Academy of Sleep Medicine).

29. Fantini, S., Franceschini, M.-A., Maier, J.S., Walker, S.A., Barbieri, B.B., and Gratton, E. (1995). Frequency-domain multichannel optical detector for noninvasive tissue spectroscopy and oximetry. *Optical Engineering* *34*, 32-42.
30. Fantini, S., and Sassaroli, A. (2020). Frequency-Domain Techniques for Cerebral and Functional Near-Infrared Spectroscopy. *Front Neurosci* *14*, 300.
31. McLay, K.M., Nederveen, J.P., Pogliaghi, S., Paterson, D.H., and Murias, J.M. (2016). Repeatability of vascular responsiveness measures derived from near-infrared spectroscopy. *Physiol Rep* *4*.
32. Nakagawa, S., and Schielzeth, H. (2013). A general and simple method for obtaining R2 from generalized linear mixed-effects models. *Methods in Ecology and Evolution* *4*, 133-142.
33. Xu, R. (2003). Measuring explained variation in linear mixed effects models. *Stat. Med.* *22*, 3527-3541.
34. Zwillich, C.W. (1998). Sleep apnoea and autonomic function. *Thorax* *53 Suppl 3*, S20-24.
35. Findley, L.J., Wilhoit, S.C., and Suratt, P.M. (1985). Apnea duration and hypoxemia during REM sleep in patients with obstructive sleep apnea. *Chest* *87*, 432-436.
36. Haba-Rubio, J., Janssens, J.P., Rochat, T., and Sforza, E. (2005). Rapid eye movement-related disordered breathing: clinical and polysomnographic features. *Chest* *128*, 3350-3357.
37. Mokhlesi, B., Finn, L.A., Hagen, E.W., Young, T., Hla, K.M., Van Cauter, E., and Peppard, P.E. (2014). Obstructive sleep apnea during REM sleep and hypertension. results of the Wisconsin Sleep Cohort. *Am J Respir Crit Care Med* *190*, 1158-1167.
38. Metz, A.J., Pugin, F., Huber, R., Achermann, P., and Wolf, M. (2013). Brain tissue oxygen saturation increases during the night in adolescents. *Adv Exp Med Biol* *789*, 113-119.
39. Petersen, L.G., and Ogoh, S. (2019). Gravity, intracranial pressure, and cerebral autoregulation. *Physiol Rep* *7*, e14039.
40. Edwards, B.A., Malhotra, A., and Sands, S.A. (2013). Adapting our approach to treatment-emergent central sleep apnea. *Sleep* *36*, 1121-1122.

## Tables

Table 1. The outcomes of the linear mixed-effects model of the CV-BV changes.

|                       | Estimate            | Std. Error          | t-value | P-value |
|-----------------------|---------------------|---------------------|---------|---------|
|                       | (10 <sup>-3</sup> ) | (10 <sup>-3</sup> ) |         |         |
| Duration of events    | 2.66                | 0.57                | 4.67    | <0.0001 |
| Apnea-Hypopnea        | 195.3               | 28.97               | 6.74    | <0.0001 |
| Mean HR within events | -5.16               | 1.22                | -4.24   | <0.0001 |
| Hourly arousal index  | 2.14                | 0.45                | 4.8     | <0.0001 |
| Baseline StO2         | -10.77              | 3.22                | -3.34   | 0.00085 |
| REM sleep-NREM sleep  | -64.75              | 29.95               | -2.16   | 0.031   |

Sleep positions

|                |       |       |       |         |
|----------------|-------|-------|-------|---------|
| Right side     | 172.5 | 34.65 | 4.98  | <0.0001 |
| Supine         | 130.0 | 31.16 | 4.17  | <0.0001 |
| CPAP pressures | -5.93 | 2.54  | -2.33 | 0.0198  |

---

HR: heart rate. REM: rapid eye movement. NREM: non-REM. CPAP: continuous positive airway

pressure. The change in apnea is the reference for the change in hypopnea in this model. Sleep on left side is the reference for sleep on right side and on supine position. NREM sleep is the reference for REM sleep.

Hourly arousal index is the arousal index calculated in each hour.

Table 2. The outcomes of the linear mixed-effects model of the decrease of StO<sub>2</sub>.

|                           | Estimate<br>(10 <sup>-2</sup> ) | Std. Error<br>(10 <sup>-2</sup> ) | t-value | P-value |
|---------------------------|---------------------------------|-----------------------------------|---------|---------|
| Duration of events        | 1.96                            | 0.16                              | 12.26   | <0.0001 |
| Apnea-Hypopnea            | 24.34                           | 7.50                              | 3.25    | 0.0012  |
| Mean HR within events     | -0.96                           | 0.33                              | -2.95   | 0.0032  |
| Baseline StO <sub>2</sub> | -5.30                           | 0.79                              | -6.71   | <0.0001 |
| REM sleep-NREM sleep      | -24.04                          | 7.83                              | -3.07   | 0.0022  |
| CPAP pressures            | -1.55                           | 0.51                              | -3.03   | 0.0025  |

HR: heart rate. REM: rapid eye movement. NREM: non-REM. CPAP: continuous positive airway pressure. The change in apnea is the reference for the change in hypopnea in this model. NREM sleep is the reference for REM sleep.

## Figure legends

Fig.1 The histogram of the durations of the respiratory events under the measurements without CPAP (n=884) and with the CPAP (n=1873). 55 events longer than 60 seconds during titration are not shown in the figure.

Fig.2 The samples of NIRS changes in obstructive sleep apneas and hypopneas. The dash lines indicate the start and the end of the events. The cerebral desaturations (de-StO<sub>2</sub>) are marked in the three events. BV is blood volume. a.u. is arbitrary unit.

Fig.3 The distributions of the coefficient of variation (CV) of cerebral blood volume (BV) and the decrease of cerebral StO<sub>2</sub> (de-StO<sub>2</sub>). Changes in CV of BV and de-StO<sub>2</sub> are correlated as shown in (A). The box plot suggests the outliers of CV of BV are larger than 3% and the cut-off 3% is marked with the dash line in its distribution (B). Similarly, the cut-off for outliers is 8.7% as shown in the box plot of de-StO<sub>2</sub> and it is marked with the dash line in the distribution (C).

Fig.4 The changes in the coefficient of variation (CV) of cerebral blood volume (BV) and the decrease of cerebral tissue oxygen saturation (StO<sub>2</sub>) versus the duration of events in each patients. The data points of different colors indicate data from different patients, and the lines of different colors are the linear fitting of the data points. We only show the events of durations shorter than 60 seconds, considering that only a minority of events is longer than 60 seconds and they may be outliers that can bias the fitting trends.



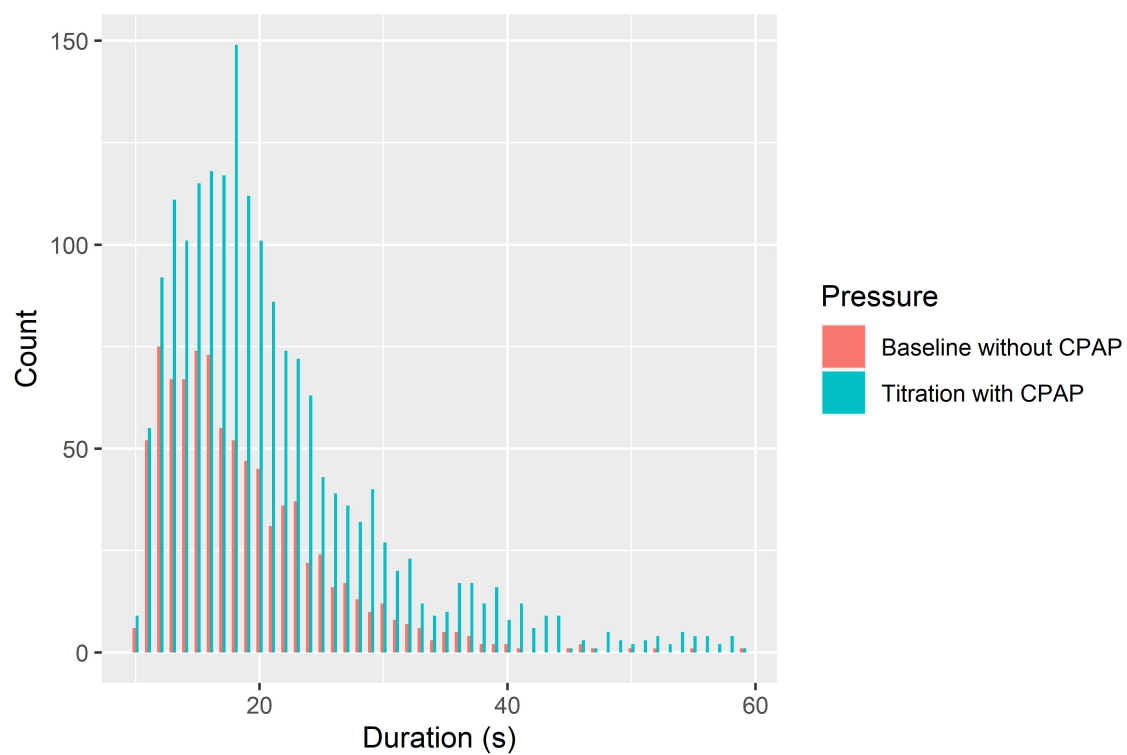

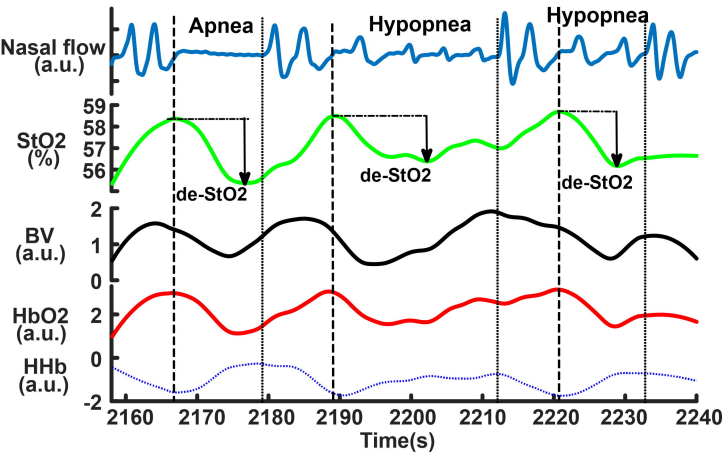

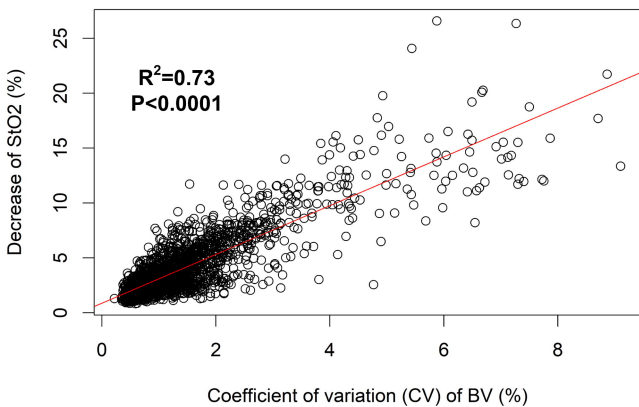

(A)

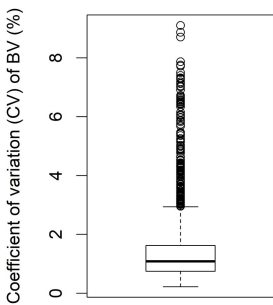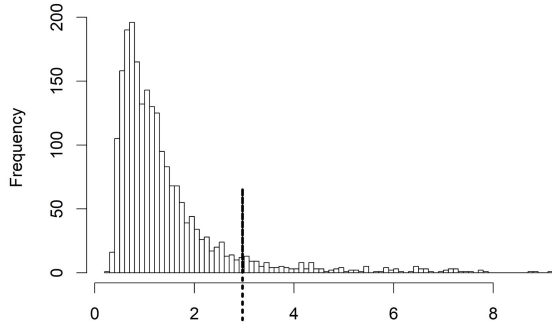

(B)

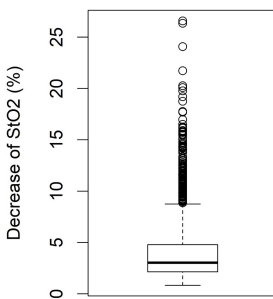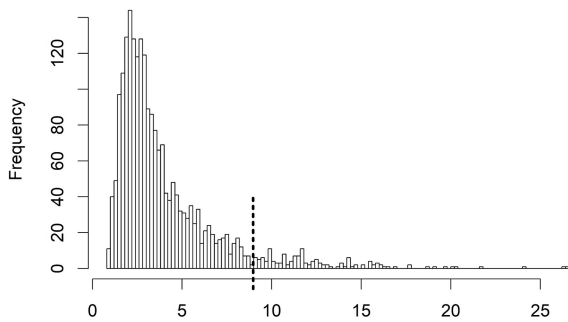

(C)

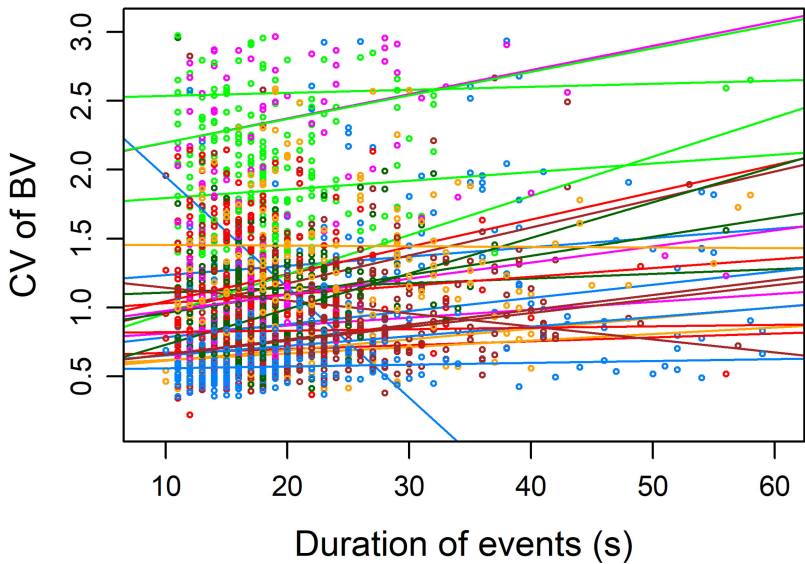

(A)

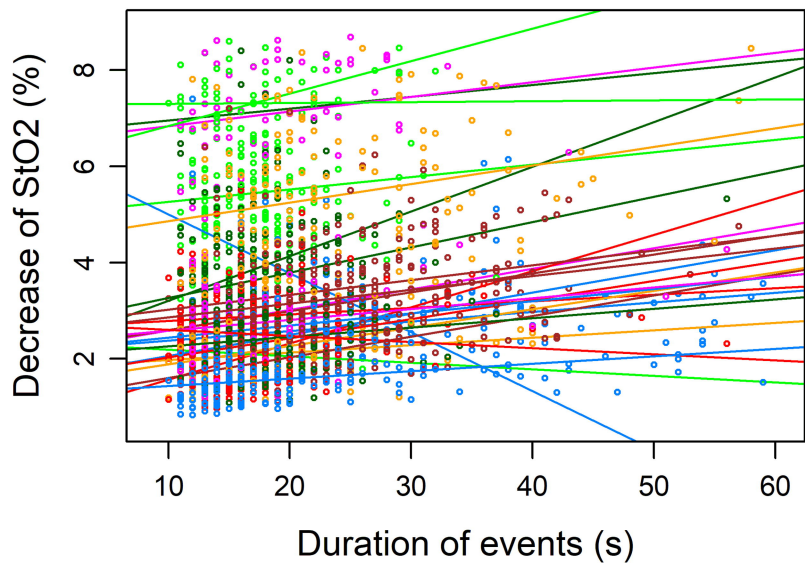

(B)
